# Supplementary material for: Cancer Nanomedicine: Emerging Strategies and Therapeutic Potentials
Source: MDPI journal article supplement (doi:10.3390/molecules28135145), 2023-06-30
Supplement: s1 [file s1]

**Table S1** Basic characteristics and Promising roles of common NPs.

| Category   | Size (nm) | Particle Structure                                                                                    | Therapeutic Use                                                                                                                                                                                                                                                                                                      |
|------------|-----------|-------------------------------------------------------------------------------------------------------|----------------------------------------------------------------------------------------------------------------------------------------------------------------------------------------------------------------------------------------------------------------------------------------------------------------------|
| Liposomes  | 50-450    | Spherical vesicle with lipid bilayer membrane structure and aqueous core                              | <ul style="list-style-type: none"> <li>–Delivery of therapeutics</li> <li>–Gene therapy</li> <li>–Biomedical implants</li> </ul>                                                                                                                                                                                     |
| SLNs       | 50-1000   | Lipid matrix solid at physiological temperature, surfactants and, in some occasions, by cosurfactants | <ul style="list-style-type: none"> <li>–Controlled release of the incorporated drug</li> <li>–Providing chemical protection for therapeutics</li> <li>–Gene therapy</li> </ul>                                                                                                                                       |
| PMs        | 10-100    | Core-shell structures of spontaneously self-assembled Amphiphilic co-polymers                         | <ul style="list-style-type: none"> <li>–Delivery of therapeutics, including pH sensitivity drug release</li> <li>–Imaging contrast agent</li> <li>–Solid tumor therapeutics</li> <li>–Gene therapy</li> </ul>                                                                                                        |
| Dendrimers | <15       | Highly branched, monodispersed macromolecule with tendrils extending from a central core              | <ul style="list-style-type: none"> <li>–Delivery of therapeutics</li> <li>–Conjugation of chemotherapeutics</li> <li>–Gene therapy</li> </ul>                                                                                                                                                                        |
| MSNs       | 50-300    | A honeycomb-like porous structure with hundreds of empty mesoporous                                   | <ul style="list-style-type: none"> <li>–Precisely regulate targeted drug release</li> <li>–Optical, and photothermal properties</li> <li>–Gene delivery</li> <li>–Overcome tumor chemoresistance</li> </ul>                                                                                                          |
| QDs        | 2-10      | Heavy metal cores surrounded by a bandgap semiconductor shell                                         | <ul style="list-style-type: none"> <li>–Optical and fluorescent properties</li> <li>–Biomedical implants</li> <li>–Imaging contrast agent</li> <li>–Therapeutics delivery</li> <li>–Quantum optical semiconductor device</li> </ul>                                                                                  |
| CNTs       | 10-200    | Tiny tubular shapes composed of carbon atoms                                                          | <ul style="list-style-type: none"> <li>–Delivery of therapeutics</li> <li>–Conjugation to antibiotics as an antimicrobial agent</li> <li>–Imaging contrast agent</li> <li>–Tumor imaging and therapeutics</li> <li>–Gene delivery</li> <li>–Efficient and rapid hemostasis, improve the safety of surgery</li> </ul> |

|                        |       |                      |                                                                                                                                                                                                                                                                                                                                                                    |
|------------------------|-------|----------------------|--------------------------------------------------------------------------------------------------------------------------------------------------------------------------------------------------------------------------------------------------------------------------------------------------------------------------------------------------------------------|
|                        |       |                      | <ul style="list-style-type: none"> <li>–Photodynamic therapy and photothermal therapy</li> </ul>                                                                                                                                                                                                                                                                   |
| Metallic nanoparticles | 1-100 | Gold, copper, silver | <ul style="list-style-type: none"> <li>–Optical, photoelectric, fluorescent, and photothermal properties</li> <li>–Imaging contrast agent</li> <li>–In vivo tumor imaging</li> <li>–Gene delivery</li> <li>–Breast cancer diagnostics</li> <li>–Adjuvants for cancer vaccines</li> <li>–Demonstrated significant cytotoxic and radiosensitizing effects</li> </ul> |
